# Supplementary material for: Compliance in Primary Prevention With Statins and Associations With Cardiovascular Risk and Death in a Low‐Risk Population With Type 2 Diabetes Mellitus
Source: PubMed Central journal article supplement — J Am Heart Assoc. 2021 Jun 19;10(13):e020395. doi: 10.1161/JAHA.120.020395 (PMC8403278; doi:10.1161/jaha.120.020395), 2021-06-19
Supplement: JAH3-10-e020395-s001.pdf [file JAH3-10-e020395-s001.pdf]

# **SUPPLEMENTAL MATERIAL**

## **Data S1.**

### **Supplemental Methods**

Description of method used to determine the dose and treatment duration of statins.

The national prescription registry does not include information on prescribed daily dosage of the medication, but rather date of dispensing, strength and quantity. For each of the statins dispensed between 1 January 2004 and 31 December 2018, we created an algorithm in which a minimum, maximum and typical daily dosage of used medication was defined. For patients who had not been in treatment in the period preceding the day of a prescription claim, the typical daily dosage was assigned, and treatment length was calculated by dividing the amount of claimed medications by the daily dosage. For patients who were covered by a previous prescription claim at the time of claiming a new prescription, the daily dosage was reset and a new daily dosage was calculated as the amount of claimed medications during the preceding period divided by time between prescription claims. If calculated dosages exceeded the predefined highest daily dosages, patients were assigned the maximally dosages and exceeding tablets were assumed to be stored and consumed during the immediate period after duration of last prescription. Based on these assumptions, we calculated whether patients at any time had tablets available or not. We defined a patient as receiving treatment if tablets were available.

**Table S1. ICD-8, ICD-10 and ATC codes used.**

|                                       | ICD-8, ICD-10 and ATC codes                                                                             | Comments                                                                                                                                                                                                                                                                                                           |
|---------------------------------------|---------------------------------------------------------------------------------------------------------|--------------------------------------------------------------------------------------------------------------------------------------------------------------------------------------------------------------------------------------------------------------------------------------------------------------------|
| <b>Outcomes of interest (ICD)</b>     |                                                                                                         | From the National Patient Registry and National Causes of Death Registry                                                                                                                                                                                                                                           |
| Myocardial infarction                 | ICD-10: I21                                                                                             |                                                                                                                                                                                                                                                                                                                    |
| Ischemic stroke                       | ICD-8: 433, 443, 436<br>ICD-10: I63-64                                                                  |                                                                                                                                                                                                                                                                                                                    |
| <b>Comorbidities (ICD)</b>            |                                                                                                         | From the National Patient Registry                                                                                                                                                                                                                                                                                 |
| Coronary artery disease               | ICD-8: 410-414<br>ICD-10: I20-25                                                                        |                                                                                                                                                                                                                                                                                                                    |
| Congestive heart failure              | ICD-8: 42709-42711, 42719, 42899, 78249<br>ICD-10: I110, I130, I132, I420, I426-429, I500-503, I508-509 |                                                                                                                                                                                                                                                                                                                    |
| Peripheral arterial disease           | ICD-8: 44389-44399<br>ICD-10: I73                                                                       |                                                                                                                                                                                                                                                                                                                    |
| Chronic renal failure                 | ICD-8: 585, T858-859, Z992<br>ICD-10: N18, I12-13                                                       |                                                                                                                                                                                                                                                                                                                    |
| Atrial fibrillation                   | ICD-8: 42793, 42794<br>ICD-10: I48                                                                      |                                                                                                                                                                                                                                                                                                                    |
| Chronic obstructive pulmonary disease | ICD-8: 490-492<br>ICD-10: J42, J44                                                                      |                                                                                                                                                                                                                                                                                                                    |
| Cancer                                | ICD-8: 140-209<br>ICD-10: C00-99                                                                        |                                                                                                                                                                                                                                                                                                                    |
| <b>Medication (ATC)</b>               |                                                                                                         | From the National Prescription Registry.<br><br>Medications at the index date were defined as dispensed prescriptions within 180 days prior to the index date. For the nested case-control population, medications were defined as dispensed prescriptions within 180 days prior to one year before the case date. |
| Exposure                              |                                                                                                         |                                                                                                                                                                                                                                                                                                                    |
| Statins                               | C10AA                                                                                                   |                                                                                                                                                                                                                                                                                                                    |
| Antidiabetics                         |                                                                                                         |                                                                                                                                                                                                                                                                                                                    |

|                                          |                                                                                                                                                                  |  |
|------------------------------------------|------------------------------------------------------------------------------------------------------------------------------------------------------------------|--|
| Metformin                                | A10BA02, A10BD02, A10BD03, A10BD05, A10BD07, A10BD08, A10BD10, A10BD11, A10BD13, A10BD14, A10BD15, A10BD16, A10BD17, A10BD18, A10BD20, A10BD22, A10BD23, A10BD25 |  |
| Insulin                                  | A10A                                                                                                                                                             |  |
| Sulfonylureas                            | A10BB, A10BD02, A10BD04, A10BD06                                                                                                                                 |  |
| DPP4-inhibitors                          | A10BH, A10BD07, A10BD08, A10BD10, A10BD11, A10BD12, A10BD13, A10BD18, A10BD21, A10BD22, A10BD24                                                                  |  |
| GLP1-analogs                             | A10BJ, A10AE54, A10AE56                                                                                                                                          |  |
| Antithrombotic agents                    |                                                                                                                                                                  |  |
| Aspirin                                  | B01AC06, N02BA01                                                                                                                                                 |  |
| ADP-receptor inhibitors                  | B01AC04, B01AC22, B01AC24                                                                                                                                        |  |
| Anticoagulants                           | BB01AA, BB01AE, BB01AF                                                                                                                                           |  |
| Other                                    |                                                                                                                                                                  |  |
| Cholesterol-lowering drugs (non-statins) | C10A, except C10AA                                                                                                                                               |  |
| RASi                                     | C09                                                                                                                                                              |  |
| Betablockers                             | C07, C09BX                                                                                                                                                       |  |
| Calcium channel blockers                 | C08, C07F, C09BB, C09DB                                                                                                                                          |  |
| Thiazides                                | C03A, C07B, C07D, C09XA52, C03EA01                                                                                                                               |  |
| Furosemide                               | C03C, C03EB01, C03EB02                                                                                                                                           |  |
| Aldosterone                              | C03DA                                                                                                                                                            |  |

**Table S2. Variables standardized (main analysis) and adjusted (nested case-control) for in the models.**

| <b>Models</b>       | <b>Variables</b>                                                                                                                                                                                                                                                                                                                                                                                                                                                                                                                                                                                                                          |
|---------------------|-------------------------------------------------------------------------------------------------------------------------------------------------------------------------------------------------------------------------------------------------------------------------------------------------------------------------------------------------------------------------------------------------------------------------------------------------------------------------------------------------------------------------------------------------------------------------------------------------------------------------------------------|
| Main analysis       | Sex, age (1-year bands), atrial fibrillation, chronic obstructive pulmonary disease, ethnicity (Danish, 1 <sup>st</sup> generation immigrants, 2 <sup>nd</sup> generation immigrants), highest attained education (ground school, high school, vocational, bachelor, master/research), metformin, sulfonylureas, DPP-4 inhibitors, GLP-1 analogues, aspirin, ADP inhibitors, anticoagulants, RASi, cholesterol-lowering drugs (non-statins), betablockers, calcium-channel blockers, thiazides, furosemide, aldosterone, year of type 2 diabetes diagnosis (2005, 2006, 2007, 2008, 2009, 2010, 2011).                                    |
| Nested case-control | Matching variables: sex and age (10-year bands).<br>Atrial fibrillation, chronic obstructive pulmonary disease, cancer, ethnicity (Danish, 1 <sup>st</sup> generation immigrants, 2 <sup>nd</sup> generation immigrants), highest attained education (ground school, high school, vocational, bachelor, master/research), metformin, sulfonylureas, DPP-4 inhibitors, GLP-1 analogues, aspirin, ADP inhibitors, anticoagulants, RASi, cholesterol-lowering drugs (non-statins), betablockers, calcium-channel blockers, thiazides, furosemide, aldosterone, year of type 2 diabetes diagnosis (2005, 2006, 2007, 2008, 2009, 2010, 2011). |

**Table S3. Population characteristics according to coverage of statins in the nested case-control population.**

|                                                      | Coverage          |                  | PDC               |                   |                   |                   |                   |
|------------------------------------------------------|-------------------|------------------|-------------------|-------------------|-------------------|-------------------|-------------------|
|                                                      | Not treated       | Treated          | <20%              | (20-40%]          | (40-60%]          | (60-80%]          | ≥80%              |
| <b>Count (%)</b>                                     | 37625             | 73574            | 3956              | 3552              | 4241              | 9059              | 52766             |
| <b>Women</b>                                         | 15,812<br>(42.0)  | 31,400<br>(42.7) | 1,606<br>(40.6)   | 1,449<br>(40.8)   | 1,635<br>(38.6)   | 3,661<br>(40.4)   | 23,049<br>(43.7)  |
| <b>Age (Q<sub>1</sub>-Q<sub>3</sub>*)</b>            | 71 [62,<br>81]    | 69 [62,<br>76]   | 68 [58,<br>77]    | 68 [59,<br>77]    | 68 [60,<br>76]    | 69 [61,<br>76]    | 70 [63,<br>77]    |
| <b>Ethnic Danish</b>                                 | 34,744<br>(92.3)  | 69,051<br>(93.9) | 3,552<br>(89.8)   | 3,210<br>(90.4)   | 3,851<br>(90.8)   | 8,303<br>(91.7)   | 50,135<br>(95.0)  |
| <b>Comorbidities</b>                                 |                   |                  |                   |                   |                   |                   |                   |
| Diabetes duration (Q <sub>1</sub> -Q <sub>3</sub> *) | 3.9 [2.6,<br>5.1] | 4 [2.8,<br>5.3]  | 3.6 [2.5,<br>5.0] | 3.8 [2.6,<br>5.1] | 3.8 [2.6,<br>5.1] | 3.9 [2.7,<br>5.2] | 4.1 [2.9,<br>5.3] |
| Coronary heart disease                               | 416 (1.1)         | 1375<br>(1.9)    | 63 (1.6)          | 67 (1.9)          | 83 (2.0)          | 160 (1.8)         | 1002<br>(1.9)     |
| Heart failure                                        | 411 (1.1)         | 590 (0.8)        | 32 (0.8)          | 25 (0.7)          | 30 (0.7)          | 91 (1.0)          | 412 (0.8)         |
| PAD                                                  | 160 (0.4)         | 537 (0.7)        | 28 (0.7)          | 36 (1.0)          | 42 (1.0)          | 65 (0.7)          | 366 (0.7)         |
| Chronic renal failure                                | 212 (0.6)         | 370 (0.5)        | 16 (0.4)          | 15 (0.4)          | 14 (0.3)          | 65 (0.7)          | 260 (0.5)         |
| Atrial fibrillation                                  | 3130<br>(8.3)     | 5084<br>(6.9)    | 286 (7.2)         | 241 (6.8)         | 261 (6.2)         | 620 (6.8)         | 3676<br>(7.0)     |
| COPD                                                 | 2793<br>(7.4)     | 4264<br>(5.8)    | 230 (5.8)         | 217 (6.1)         | 250 (5.9)         | 579 (6.4)         | 2988<br>(5.7)     |
| Cancer                                               | 3670<br>(9.8)     | 6187<br>(8.4)    | 359 (9.1)         | 267 (7.5)         | 372 (8.8)         | 783 (8.6)         | 4406<br>(8.4)     |
| <b>Highest attained education</b>                    |                   |                  |                   |                   |                   |                   |                   |
| Basic school                                         | 18,130<br>(48.2)  | 33,715<br>(45.8) | 1,764<br>(44.6)   | 1,611<br>(45.4)   | 1,809<br>(42.7)   | 3,879<br>(42.8)   | 24,652<br>(46.7)  |
| Upper secondary                                      | 869 (2.3)         | 1394<br>(1.9)    | 98 (2.5)          | 78 (2.2)          | 97 (2.3)          | 209 (2.3)         | 912 (1.7)         |
| Vocational                                           | 12747<br>(33.9)   | 27573<br>(37.5)  | 1491<br>(37.7)    | 1325<br>(37.3)    | 1652<br>(39.0)    | 3504<br>(38.7)    | 19601<br>(37.1)   |
| Short or medium length higher education              | 4334<br>(11.5)    | 8568<br>(11.6)   | 464<br>(11.7)     | 382<br>(10.8)     | 522<br>(12.3)     | 1153<br>(12.7)    | 6047<br>(11.5)    |
| Master's degree or higher                            | 1545<br>(4.1)     | 2324<br>(3.2)    | 139 (3.5)         | 156 (4.4)         | 161 (3.8)         | 314 (3.5)         | 1554<br>(2.9)     |
| <b>Medication</b>                                    |                   |                  |                   |                   |                   |                   |                   |
| Metformin                                            | 22613<br>(60.1)   | 58368<br>(79.3)  | 2678<br>(67.7)    | 2534<br>(71.3)    | 3146<br>(74.2)    | 7192<br>(79.4)    | 42818<br>(81.1)   |
| Insulin                                              | 2376<br>(6.3)     | 3908<br>(5.3)    | 277 (7.0)         | 238 (6.7)         | 268 (6.3)         | 493 (5.4)         | 2632<br>(5.0)     |

|                                 |                 |                 |                |                |                |                |                 |
|---------------------------------|-----------------|-----------------|----------------|----------------|----------------|----------------|-----------------|
| Sulfonylureas                   | 8174<br>(21.7)  | 14668<br>(19.9) | 788<br>(19.9)  | 751<br>(21.1)  | 883<br>(20.8)  | 1800<br>(19.9) | 10446<br>(19.8) |
| DPP-4 inhibitor                 | 1548<br>(4.1)   | 4736<br>(6.4)   | 238 (6.0)      | 213 (6.0)      | 259 (6.1)      | 616 (6.8)      | 3410<br>(6.5)   |
| GLP-1 analogue                  | 488 (1.3)       | 1540<br>(2.1)   | 74 (1.9)       | 77 (2.2)       | 92 (2.2)       | 207 (2.3)      | 1090<br>(2.1)   |
| Aspirin                         | 7538<br>(20.0)  | 24409<br>(33.2) | 906<br>(22.9)  | 943<br>(26.5)  | 1144<br>(27.0) | 2772<br>(30.6) | 18644<br>(35.3) |
| ADP inhibitor                   | 155 (0.4)       | 844 (1.1)       | 32 (0.8)       | 39 (1.1)       | 41 (1.0)       | 102 (1.1)      | 630 (1.2)       |
| Anticoagulants                  | 2398<br>(6.4)   | 4467<br>(6.1)   | 222 (5.6)      | 175 (4.9)      | 207 (4.9)      | 521 (5.8)      | 3342<br>(6.3)   |
| RAS inhibitor                   | 16378<br>(43.5) | 47010<br>(63.9) | 1943<br>(49.1) | 1930<br>(54.3) | 2356<br>(55.6) | 5454<br>(60.2) | 35327<br>(67.0) |
| Non-statin lipid-lowering drugs | 487 (1.3)       | 264 (0.4)       | 75 (1.9)       | 50 (1.4)       | 37 (0.9)       | 34 (0.4)       | 68 (0.1)        |
| Beta blocker                    | 6751<br>(17.9)  | 15915<br>(21.6) | 657<br>(16.6)  | 652<br>(18.4)  | 769<br>(18.1)  | 1820<br>(20.1) | 12017<br>(22.8) |
| CCB                             | 8251<br>(21.9)  | 22343<br>(30.4) | 859<br>(21.7)  | 871<br>(24.5)  | 1080<br>(25.5) | 2507<br>(27.7) | 17026<br>(32.3) |
| Thiazides                       | 7383<br>(19.6)  | 16279<br>(22.1) | 753<br>(19.0)  | 701<br>(19.7)  | 832<br>(19.6)  | 1843<br>(20.3) | 12150<br>(23.0) |
| Furosemide                      | 4960<br>(13.2)  | 7788<br>(10.6)  | 347 (8.8)      | 301 (8.5)      | 382 (9.0)      | 958<br>(10.6)  | 5800<br>(11.0)  |
| Aldosterone                     | 1436<br>(3.8)   | 1971<br>(2.7)   | 96 (2.4)       | 75 (2.1)       | 102 (2.4)      | 226 (2.5)      | 1472<br>(2.8)   |

PDC = proportion of days covered, Q<sub>1</sub>-Q<sub>3</sub> = 25<sup>th</sup> percentile-75<sup>th</sup> percentile, PAD = peripheral arterial disease, COPD = chronic obstructive pulmonary disease, DPP4 = dipeptidyl peptidase 4, GLP1 = glucagon-like peptide 1, ADP = adenosine diphosphate, NOAC = novel oral anticoagulant, RAS inhibitor = renin-angiotensin system inhibitor, CCB = calcium channel blockers.

Highest attained education: Basic school (primary, lower secondary; 9 years); Upper secondary (general secondary, technical secondary; "high-school"); Vocational (e.g., electrician or chef); Short or medium length higher education (academy professional degree, professional bachelor's degree, university bachelor's degree; 2 to 4 years following upper secondary); Master's degree or higher.

**Table S4. Hazard ratios of adjustment variables used for the main analysis according to coverage (reference = risk<sub>treated</sub>).**

| Variable                        | Units                               | Hazard ratio     | P-value |
|---------------------------------|-------------------------------------|------------------|---------|
| Sex                             | Men vs. women                       | 1.46 [1.40;1.52] | < 0.001 |
| Age                             |                                     | 1.06 [1.06;1.07] | < 0.001 |
| Atrial fibrillation             | Yes vs. no                          | 1.30 [1.19;1.43] | < 0.001 |
| COPD                            | Yes vs. no                          | 1.98 [1.86;2.11] | < 0.001 |
| Ethnicity                       | 1st generation immigrant vs. Danish | 0.78 [0.71;0.85] | < 0.001 |
|                                 | 2nd generation immigrant vs. Danish | 0.56 [0.27;1.17] | 0.121   |
| Highest attained education      | Highschool vs. ground school        | 1.03 [0.89;1.18] | 0.73    |
|                                 | Vocational vs. ground school        | 0.90 [0.86;0.94] | < 0.001 |
|                                 | Bachelor vs. ground school          | 0.82 [0.77;0.88] | < 0.001 |
|                                 | Master vs. ground school            | 0.72 [0.64;0.81] | < 0.001 |
| Metformin                       | Yes vs. no                          | 0.86 [0.82;0.90] | < 0.001 |
| Insulin                         | Yes vs. no                          | 1.72 [1.59;1.86] | < 0.001 |
| Sulfonylurea                    | Yes vs. no                          | 1.06 [1.01;1.12] | 0.023   |
| DPP4 inhibitor                  | Yes vs. no                          | 1.04 [0.94;1.16] | 0.465   |
| GLP-1 analog                    | Yes vs. no                          | 0.92 [0.74;1.14] | 0.436   |
| Aspirin                         | Yes vs. no                          | 1.06 [1.01;1.11] | 0.01    |
| ADP-inhibitor                   | Yes vs. no                          | 2.09 [1.67;2.61] | < 0.001 |
| Anticoagulants                  | Yes vs. no                          | 0.92 [0.83;1.02] | 0.13    |
| Non-statin lipid-lowering drugs | Yes vs. no                          | 1.05 [0.81;1.36] | 0.701   |
| RASi                            | Yes vs. no                          | 0.85 [0.81;0.88] | < 0.001 |
| Betablocker                     | Yes vs. no                          | 1.07 [1.02;1.13] | 0.007   |
| Calcium channel blocker         | Yes vs. no                          | 1.03 [0.98;1.07] | 0.288   |
| Thiazide                        | Yes vs. no                          | 1.08 [1.03;1.13] | 0.003   |
| Furosemide                      | Yes vs. no                          | 1.61 [1.52;1.71] | < 0.001 |
| Aldosterone                     | Yes vs. no                          | 1.50 [1.37;1.65] | < 0.001 |
| Year                            | 2006 vs. 2005                       | 1.00 [0.93;1.08] | 0.93    |



|               |                  |         |
|---------------|------------------|---------|
| 2007 vs. 2005 | 0.97 [0.90;1.05] | 0.452   |
| 2008 vs. 2005 | 0.92 [0.85;0.99] | 0.035   |
| 2009 vs. 2005 | 0.90 [0.83;0.97] | 0.009   |
| 2010 vs. 2005 | 0.87 [0.81;0.94] | < 0.001 |
| 2011 vs. 2005 | 0.89 [0.83;0.96] | 0.003   |

**Table S5. Hazard ratios of adjustment variables used for the main analysis according to proportion of days covered (reference = risk<sub>PDC 80-100%</sub>).**

| <b>Variable</b>                 | <b>Units</b>                        | <b>Hazard ratio</b> | <b>P-value</b> |
|---------------------------------|-------------------------------------|---------------------|----------------|
| Sex                             | Men vs. women                       | 1.45 [1.37;1.54]    | < 0.001        |
| Age                             |                                     | 1.06 [1.06;1.07]    | < 0.001        |
| Atrial fibrillation             | Yes vs. no                          | 1.33 [1.15;1.53]    | < 0.001        |
| COPD                            | Yes vs. no                          | 2.06 [1.87;2.27]    | < 0.001        |
| Ethnicity                       | 1st generation immigrant vs. Danish | 0.77 [0.67;0.88]    | < 0.001        |
|                                 | 2nd generation immigrant vs. Danish | 0.48 [0.12;1.91]    | 0.294          |
| Highest attained education      | Highschool vs. ground school        | 0.96 [0.77;1.19]    | 0.688          |
|                                 | Vocational vs. ground school        | 0.87 [0.81;0.93]    | < 0.001        |
|                                 | Bachelor vs. ground school          | 0.83 [0.75;0.92]    | < 0.001        |
|                                 | Master vs. ground school            | 0.78 [0.66;0.93]    | 0.006          |
| Metformin                       | Yes vs. no                          | 0.91 [0.85;0.99]    | 0.02           |
| Insulin                         | Yes vs. no                          | 1.75 [1.54;1.99]    | < 0.001        |
| Sulfonylurea                    | Yes vs. no                          | 1.09 [1.00;1.18]    | 0.039          |
| DPP4 inhibitor                  | Yes vs. no                          | 1.12 [0.98;1.29]    | 0.108          |
| GLP-1 analog                    | Yes vs. no                          | 1.10 [0.84;1.45]    | 0.48           |
| Aspirin                         | Yes vs. no                          | 1.07 [1.01;1.14]    | 0.026          |
| ADP-inhibitor                   | Yes vs. no                          | 2.13 [1.64;2.78]    | < 0.001        |
| Anticoagulants                  | Yes vs. no                          | 1.07 [0.92;1.24]    | 0.394          |
| Non-statin lipid-lowering drugs | Yes vs. no                          | 1.13 [0.78;1.63]    | 0.529          |
| RASi                            | Yes vs. no                          | 0.93 [0.87;0.98]    | 0.014          |
| Betablocker                     | Yes vs. no                          | 1.08 [1.01;1.16]    | 0.032          |
| Calcium channel blocker         | Yes vs. no                          | 1.05 [0.99;1.12]    | 0.118          |
| Thiazide                        | Yes vs. no                          | 1.08 [1.01;1.16]    | 0.029          |
| Furosemide                      | Yes vs. no                          | 1.63 [1.49;1.77]    | < 0.001        |
| Aldosterone                     | Yes vs. no                          | 1.10 [0.94;1.29]    | 0.246          |
| Year                            | 2006 vs. 2005                       | 1.01 [0.89;1.14]    | 0.901          |

|               |                  |         |
|---------------|------------------|---------|
| 2007 vs. 2005 | 0.91 [0.80;1.03] | 0.129   |
| 2008 vs. 2005 | 0.88 [0.78;0.99] | 0.037   |
| 2009 vs. 2005 | 0.83 [0.73;0.94] | 0.002   |
| 2010 vs. 2005 | 0.81 [0.72;0.91] | < 0.001 |
| 2011 vs. 2005 | 0.84 [0.75;0.95] | 0.004   |

**Table S6. Hazard ratios of adjustment variables used for the nested case control population according to coverage (reference = risk<sub>treated</sub>).**

| Variable                        | Units                               | Hazard ratio     | P-value |
|---------------------------------|-------------------------------------|------------------|---------|
| Atrial fibrillation             | Yes vs. no                          | 1.11 [1.01;1.22] | 0.027   |
| COPD                            | Yes vs. no                          | 1.91 [1.78;2.04] | <0.001  |
| Ethnicity                       | 1st generation immigrant vs. Danish | 0.71 [0.65;0.78] | <0.001  |
|                                 | 2nd generation immigrant vs. Danish | 0.44 [0.20;0.95] | 0.036   |
| Highest attained education      | Highschool vs. ground school        | 0.95 [0.82;1.10] | 0.502   |
|                                 | Vocational vs. ground school        | 0.86 [0.82;0.90] | <0.001  |
|                                 | Bachelor vs. ground school          | 0.78 [0.72;0.83] | <0.001  |
|                                 | Master vs. ground school            | 0.71 [0.62;0.80] | <0.001  |
| Metformin                       | Yes vs. no                          | 0.91 [0.86;0.96] | <0.001  |
| Insulin                         | Yes vs. no                          | 1.49 [1.38;1.62] | <0.001  |
| Sulfonylurea                    | Yes vs. no                          | 1.15 [1.09;1.21] | <0.001  |
| DPP4 inhibitor                  | Yes vs. no                          | 0.79 [0.72;0.88] | <0.001  |
| GLP-1 analog                    | Yes vs. no                          | 0.62 [0.51;0.74] | <0.001  |
| Aspirin                         | Yes vs. no                          | 1.09 [1.03;1.14] | <0.001  |
| ADP-inhibitor                   | Yes vs. no                          | 1.50 [1.23;1.82] | <0.001  |
| Anticoagulants                  | Yes vs. no                          | 1.07 [0.97;1.18] | 0.205   |
| Non-statin lipid-lowering drugs | Yes vs. no                          | 0.76 [0.58;0.99] | 0.045   |
| RASi                            | Yes vs. no                          | 0.83 [0.79;0.87] | <0.001  |
| Betablocker                     | Yes vs. no                          | 1.06 [1.01;1.12] | 0.027   |
| Calcium channel blocker         | Yes vs. no                          | 1.02 [0.97;1.07] | 0.526   |
| Thiazide                        | Yes vs. no                          | 1.12 [1.06;1.18] | <0.001  |
| Furosemide                      | Yes vs. no                          | 1.59 [1.49;1.69] | <0.001  |
| Aldosterone                     | Yes vs. no                          | 1.32 [1.20;1.46] | <0.001  |
| Year                            | 2006 vs. 2005                       | 1.00 [0.92;1.09] | 0.983   |
|                                 | 2007 vs. 2005                       | 0.92 [0.84;1.01] | 0.072   |
|                                 | 2008 vs. 2005                       | 0.82 [0.75;0.91] | <0.001  |

|               |                  |        |
|---------------|------------------|--------|
| 2009 vs. 2005 | 0.77 [0.70;0.86] | <0.001 |
| 2010 vs. 2005 | 0.72 [0.65;0.81] | <0.001 |
| 2011 vs. 2005 | 0.70 [0.62;0.79] | <0.001 |

**Table S7. Hazard ratios of adjustment variables used for the nested case control population according to proportion of days covered (reference = risk<sub>PDC 80-100%</sub>).**

| Variable                        | Units                               | Hazard ratio     | P-value |
|---------------------------------|-------------------------------------|------------------|---------|
| Atrial fibrillation             | Yes vs. no                          | 1.09 [0.95;1.24] | 0.227   |
| COPD                            | Yes vs. no                          | 1.96 [1.77;2.16] | < 0.001 |
| Ethnicity                       | 1st generation immigrant vs. Danish | 0.69 [0.60;0.80] | < 0.001 |
|                                 | 2nd generation immigrant vs. Danish | 0.34 [0.08;1.44] | 0.144   |
| Highest attained education      | Highschool vs. ground school        | 0.87 [0.70;1.09] | 0.234   |
|                                 | Vocational vs. ground school        | 0.85 [0.80;0.91] | < 0.001 |
|                                 | Bachelor vs. ground school          | 0.77 [0.70;0.85] | < 0.001 |
|                                 | Master vs. ground school            | 0.75 [0.62;0.90] | 0.002   |
| Metformin                       | Yes vs. no                          | 0.92 [0.85;0.99] | 0.031   |
| Insulin                         | Yes vs. no                          | 1.40 [1.24;1.57] | < 0.001 |
| Sulfonylurea                    | Yes vs. no                          | 1.14 [1.05;1.23] | 0.001   |
| DPP4 inhibitor                  | Yes vs. no                          | 0.85 [0.75;0.96] | 0.01    |
| GLP-1 analog                    | Yes vs. no                          | 0.65 [0.52;0.82] | < 0.001 |
| Aspirin                         | Yes vs. no                          | 1.14 [1.07;1.21] | < 0.001 |
| ADP-inhibitor                   | Yes vs. no                          | 1.56 [1.24;1.96] | < 0.001 |
| Anticoagulants                  | Yes vs. no                          | 1.25 [1.08;1.43] | 0.002   |
| Non-statin lipid-lowering drugs | Yes vs. no                          | 0.69 [0.42;1.13] | 0.142   |
| RASi                            | Yes vs. no                          | 0.91 [0.86;0.97] | 0.004   |
| Betablocker                     | Yes vs. no                          | 1.10 [1.02;1.18] | 0.01    |
| Calcium channel blocker         | Yes vs. no                          | 1.07 [1.00;1.14] | 0.049   |
| Thiazide                        | Yes vs. no                          | 1.09 [1.02;1.17] | 0.012   |
| Furosemide                      | Yes vs. no                          | 1.55 [1.42;1.69] | < 0.001 |
| Aldosterone                     | Yes vs. no                          | 1.26 [1.08;1.47] | 0.003   |
| Year                            | 2006 vs. 2005                       | 0.90 [0.79;1.02] | 0.094   |
|                                 | 2007 vs. 2005                       | 0.86 [0.76;0.98] | 0.025   |
|                                 | 2008 vs. 2005                       | 0.74 [0.65;0.85] | < 0.001 |

|               |                  |         |
|---------------|------------------|---------|
| 2009 vs. 2005 | 0.67 [0.58;0.78] | < 0.001 |
| 2010 vs. 2005 | 0.63 [0.54;0.73] | < 0.001 |
| 2011 vs. 2005 | 0.62 [0.53;0.73] | < 0.001 |

**Figure S1. Illustration of the study setup in the main analysis (A) and in the nested case control population (B).**

**A) Main analysis**

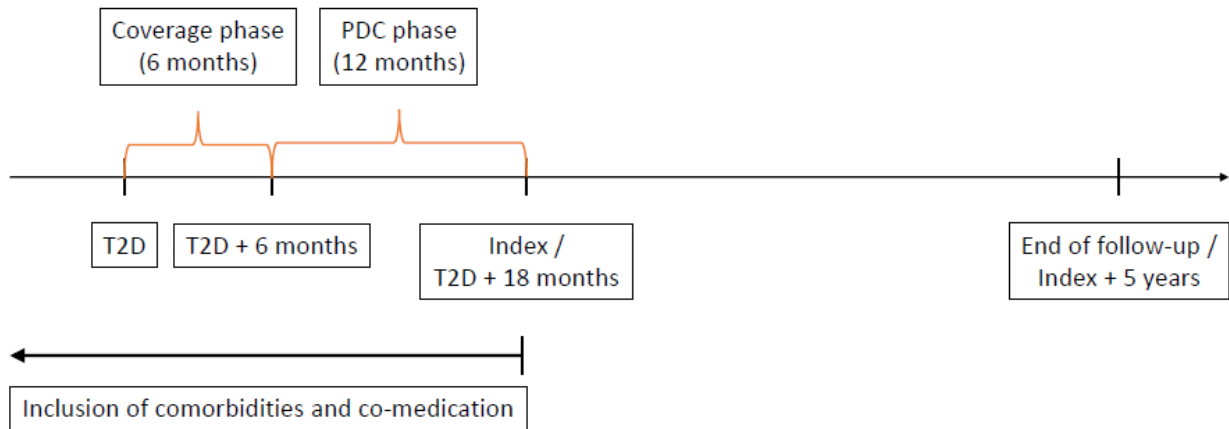

**B) Nested case control analysis**

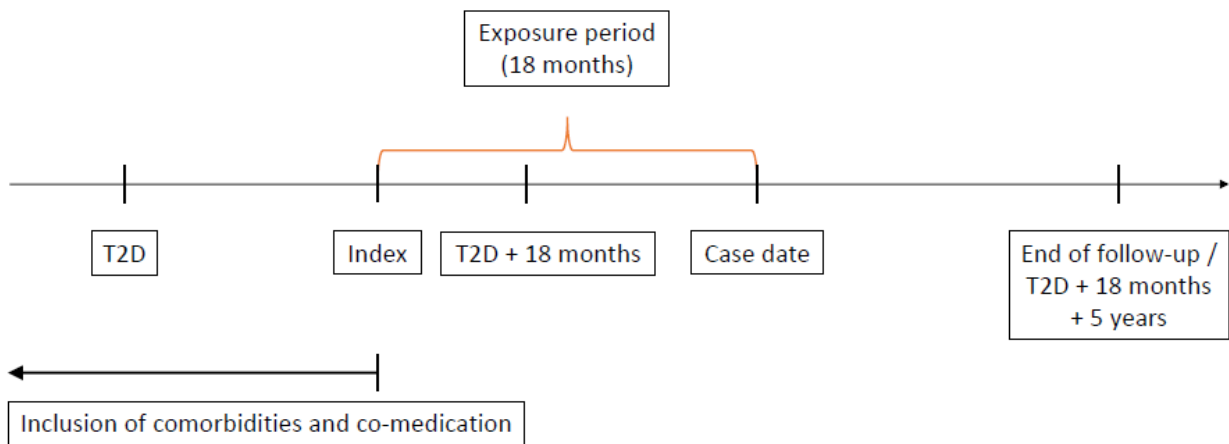

T2D = Type 2 diabetes, PDC = proportion of days covered.



**Figure S2. Flowchart.**

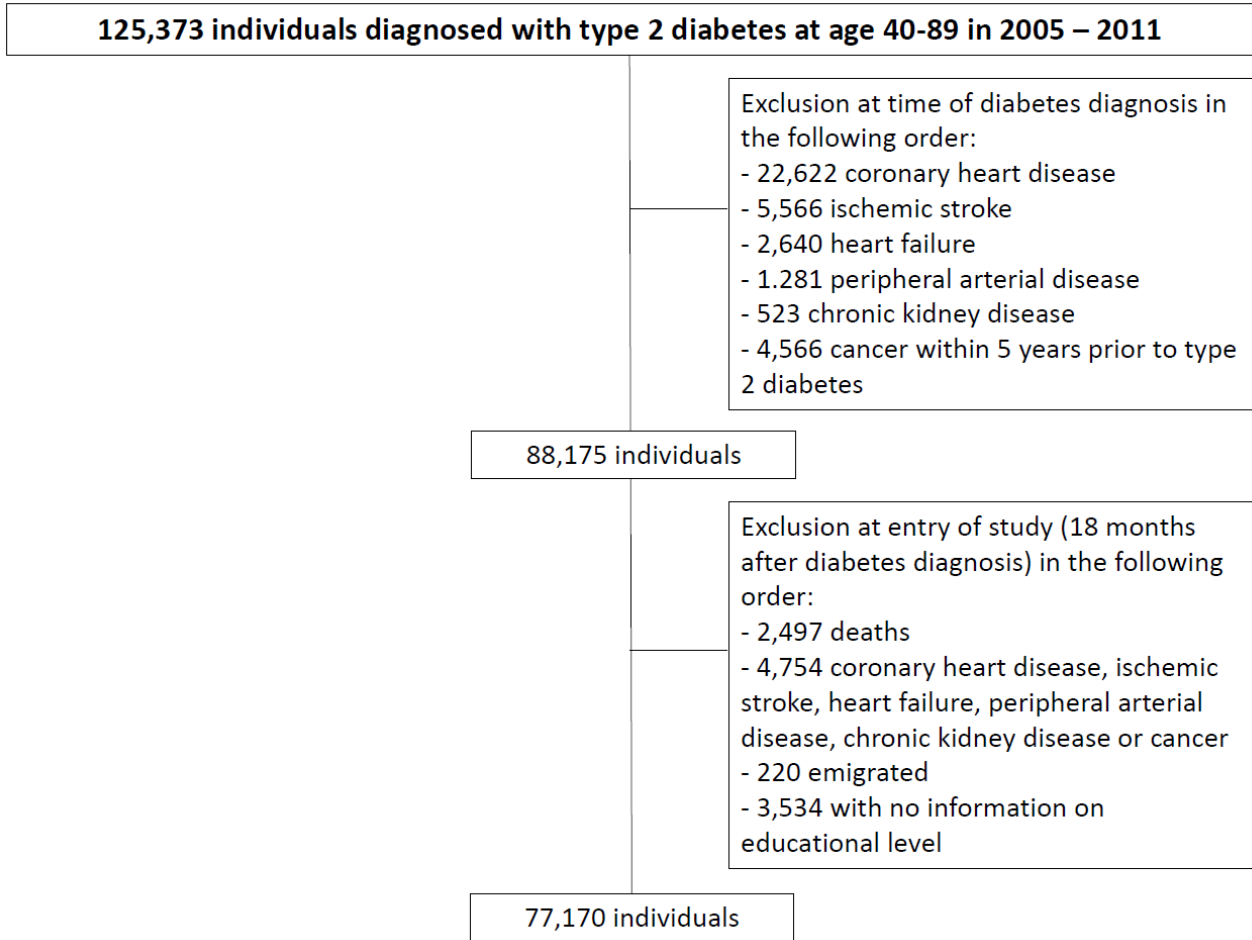

Figure S3. A) Proportion of patients treated with statins at index by age and sex, and B) mean proportion of days covered at index by age and sex in patients treated with statins at index.

A) Initiated treatment with statins

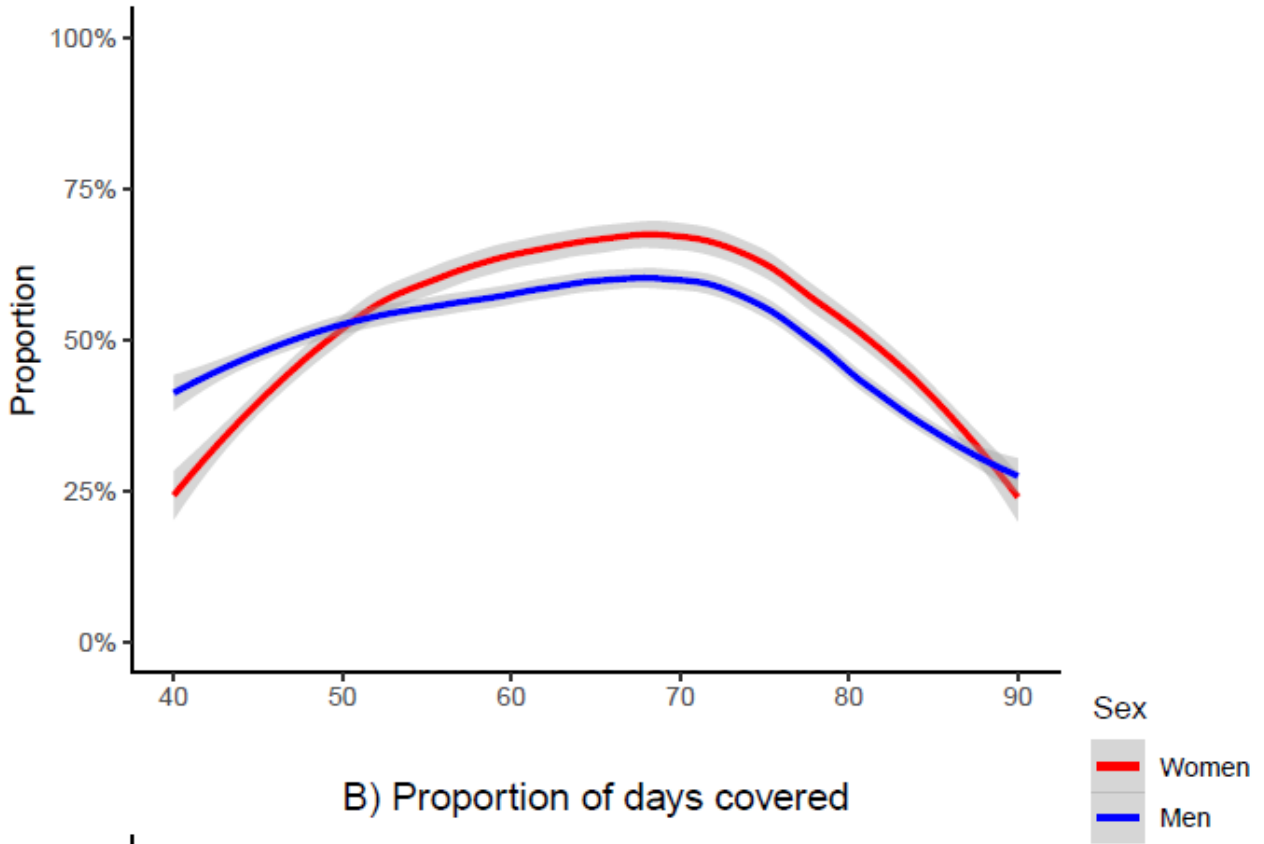

B) Proportion of days covered

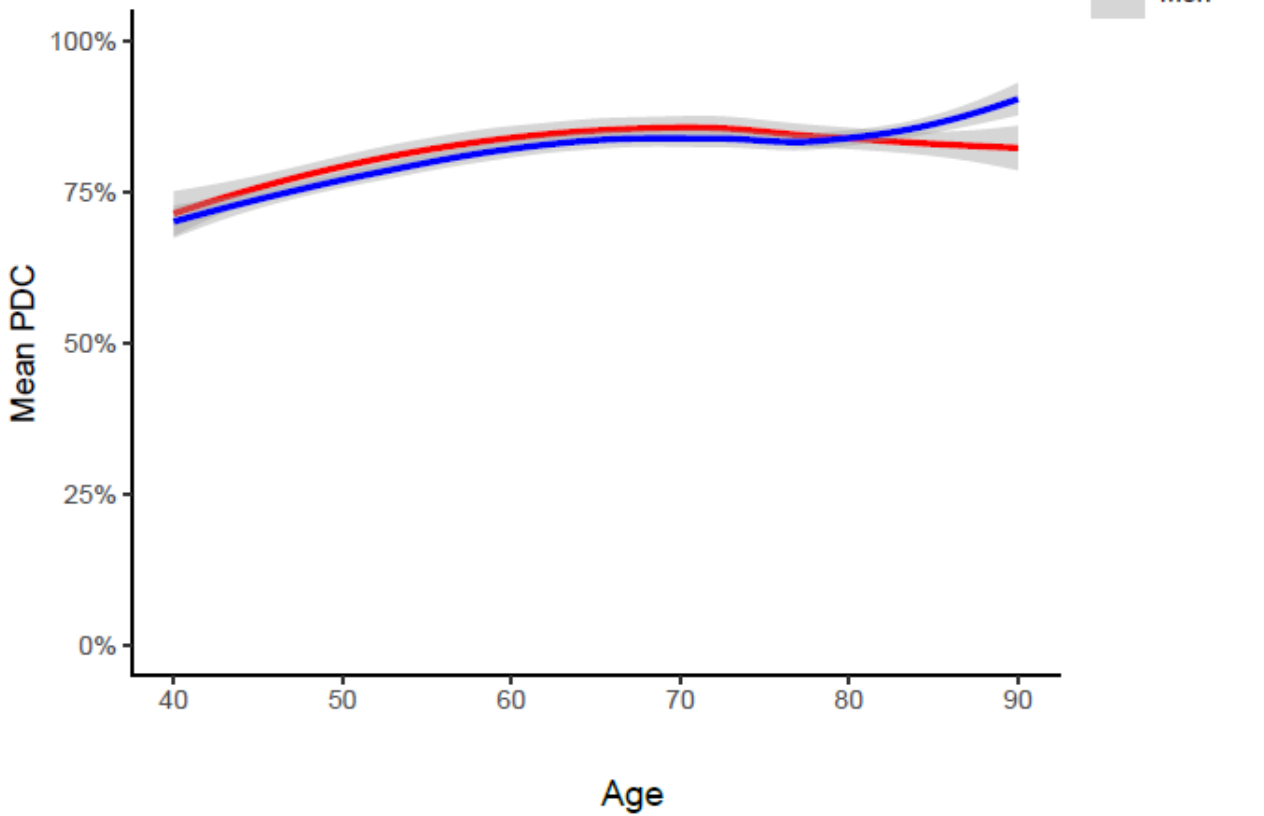

**Figure S4. Crude and standardized 5-year risk of myocardial infarction, ischemic stroke or all-cause death according to sex, coverage and proportion of days covered.**

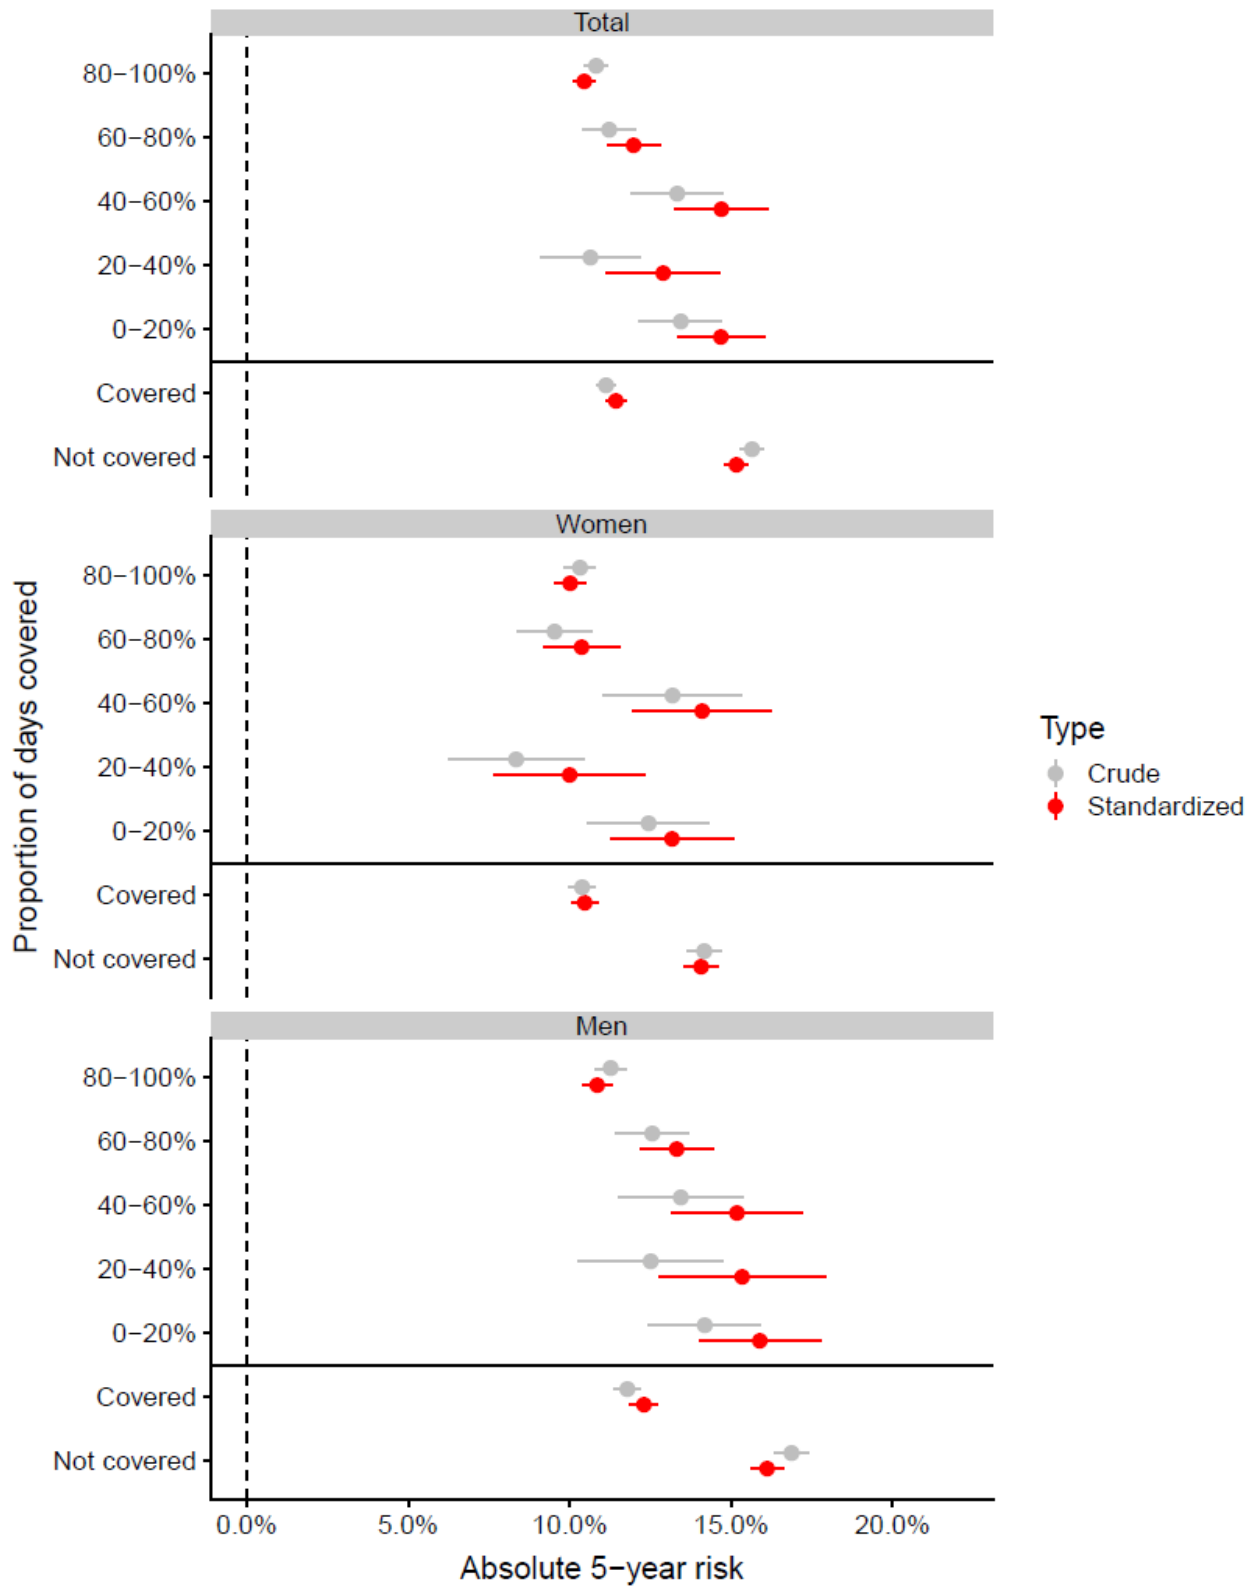

**Figure S5. Crude 5-year risk difference of myocardial infarction, ischemic stroke or all-cause death according to sex, coverage of statins (reference = risk<sub>treated</sub>) and proportion of days covered (reference = risk<sub>PDC 80-100%</sub>).**

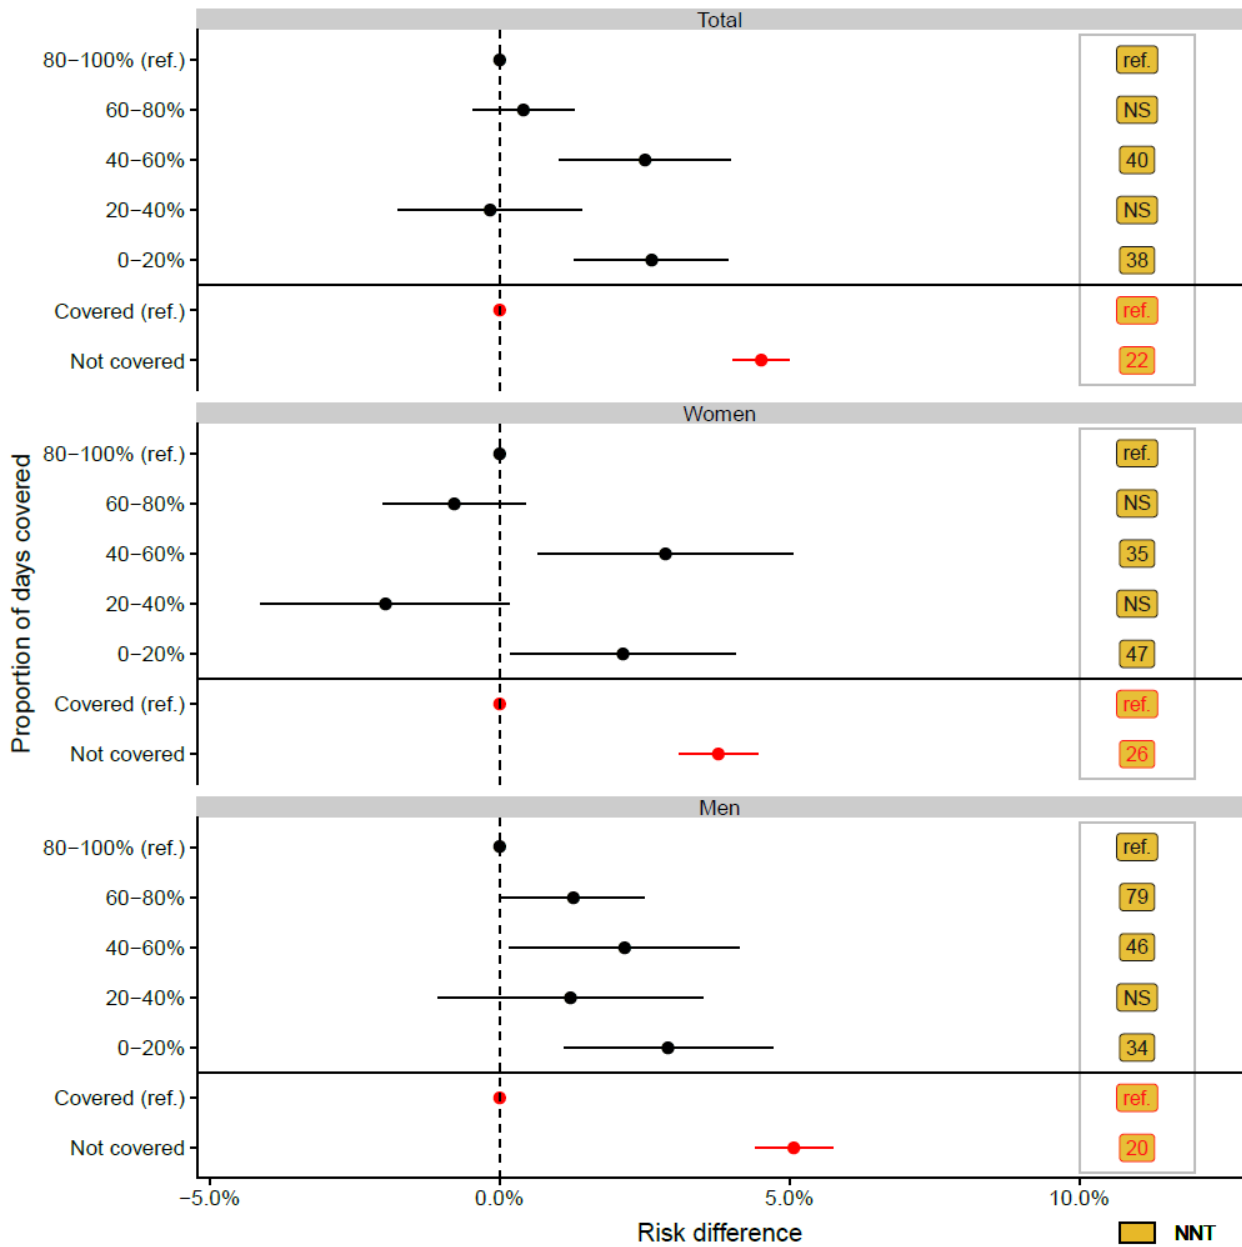

NNT = Numbers needed to treat, NS = Not significant.

**Figure S6. Standardized 5-year risk of myocardial infarction, ischemic stroke or all-cause death according to sex, age and coverage.**

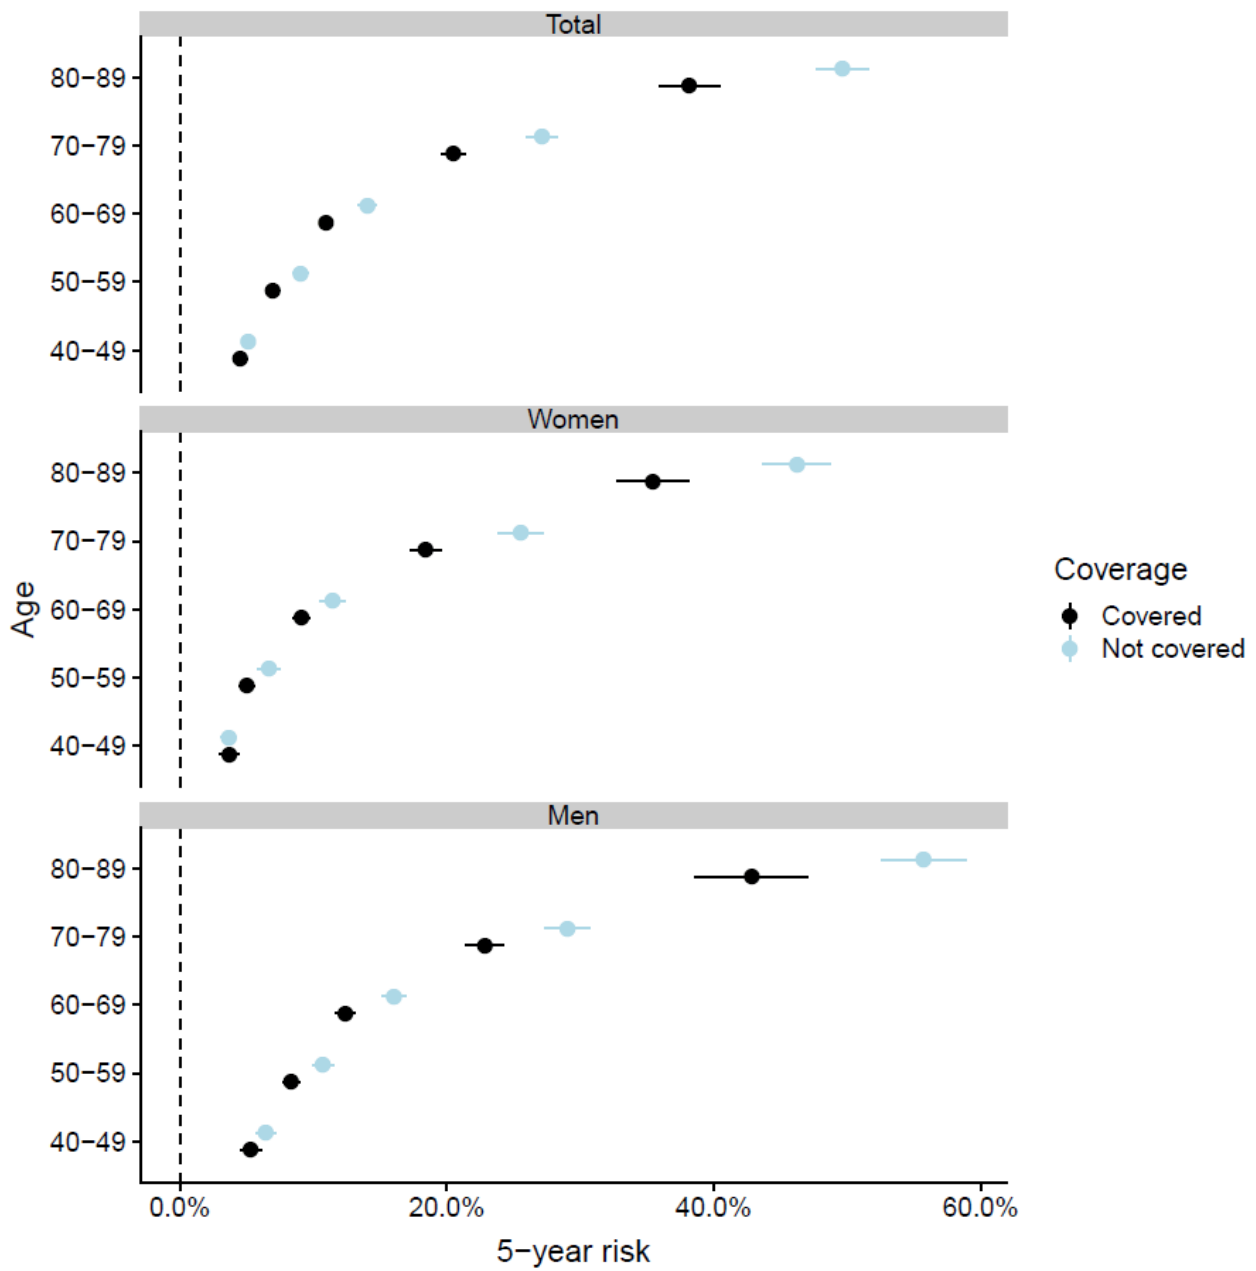

**Figure S7. A) Crude and standardized 5-year risk of hospital discharge due to any skin lesion according to sex, coverage of statins and proportion of days covered. B) Standardized 5-year risk of hospital discharge due to any skin lesion according to sex, age-group and coverage of statins.**

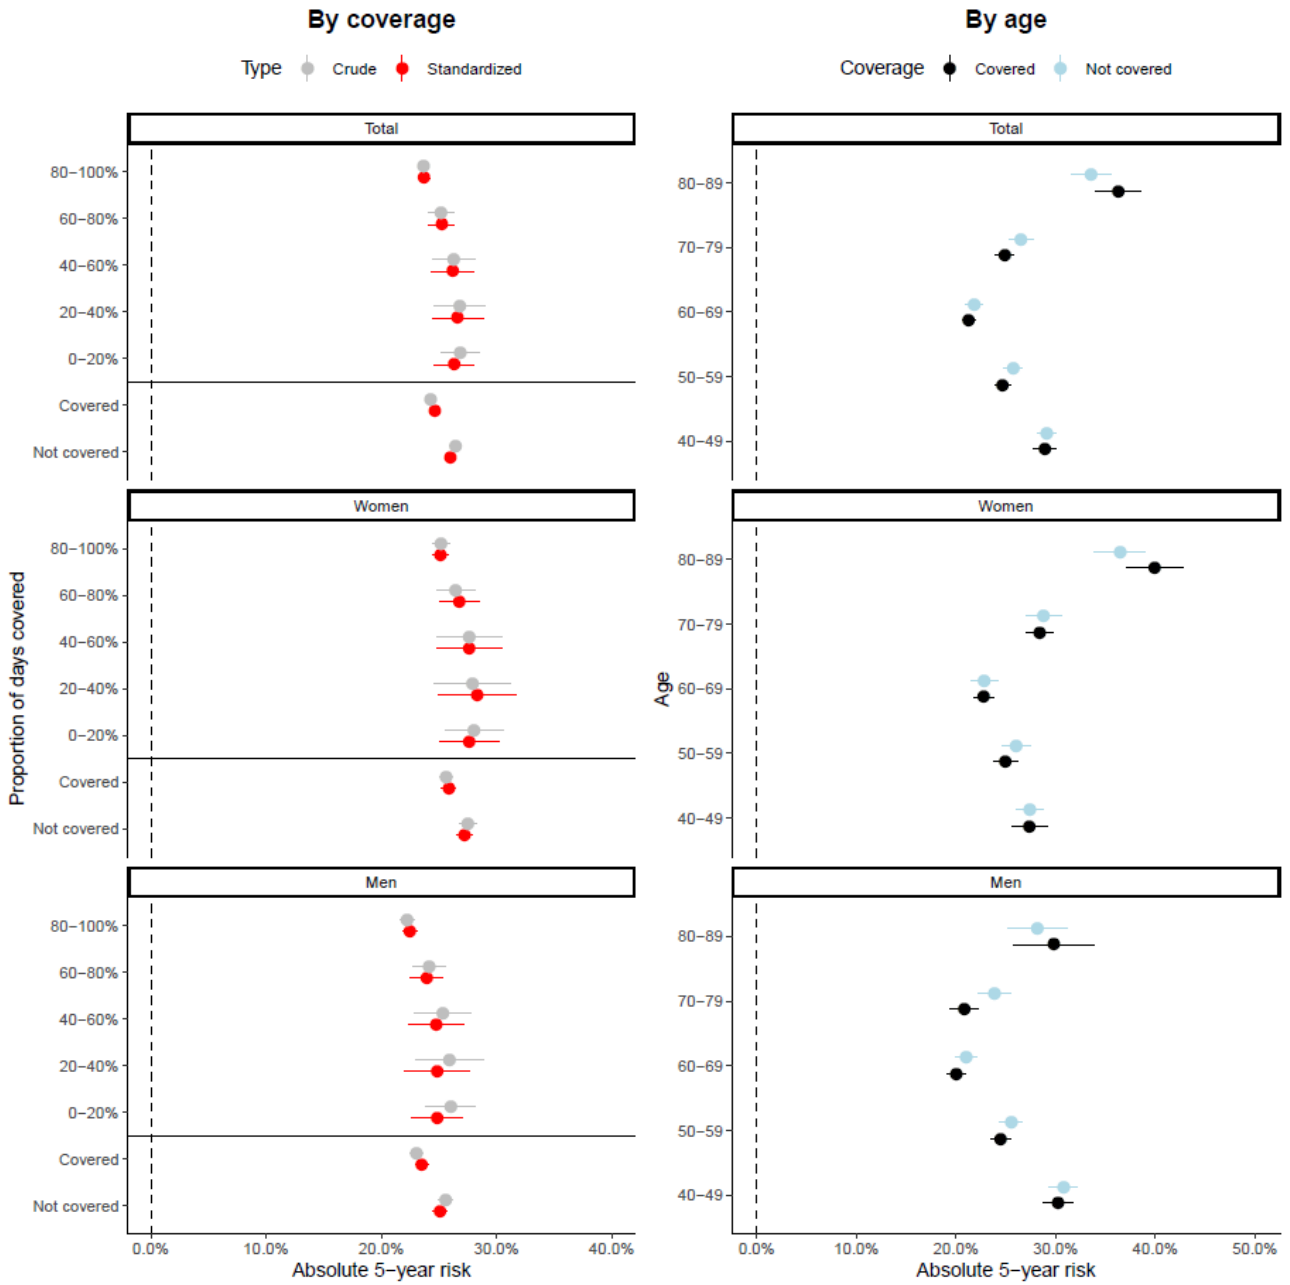

**Figure S8. Coverage of statins according to sex, age group at time of type 2 diabetes diagnosis and year of follow-up in event-free individuals.**

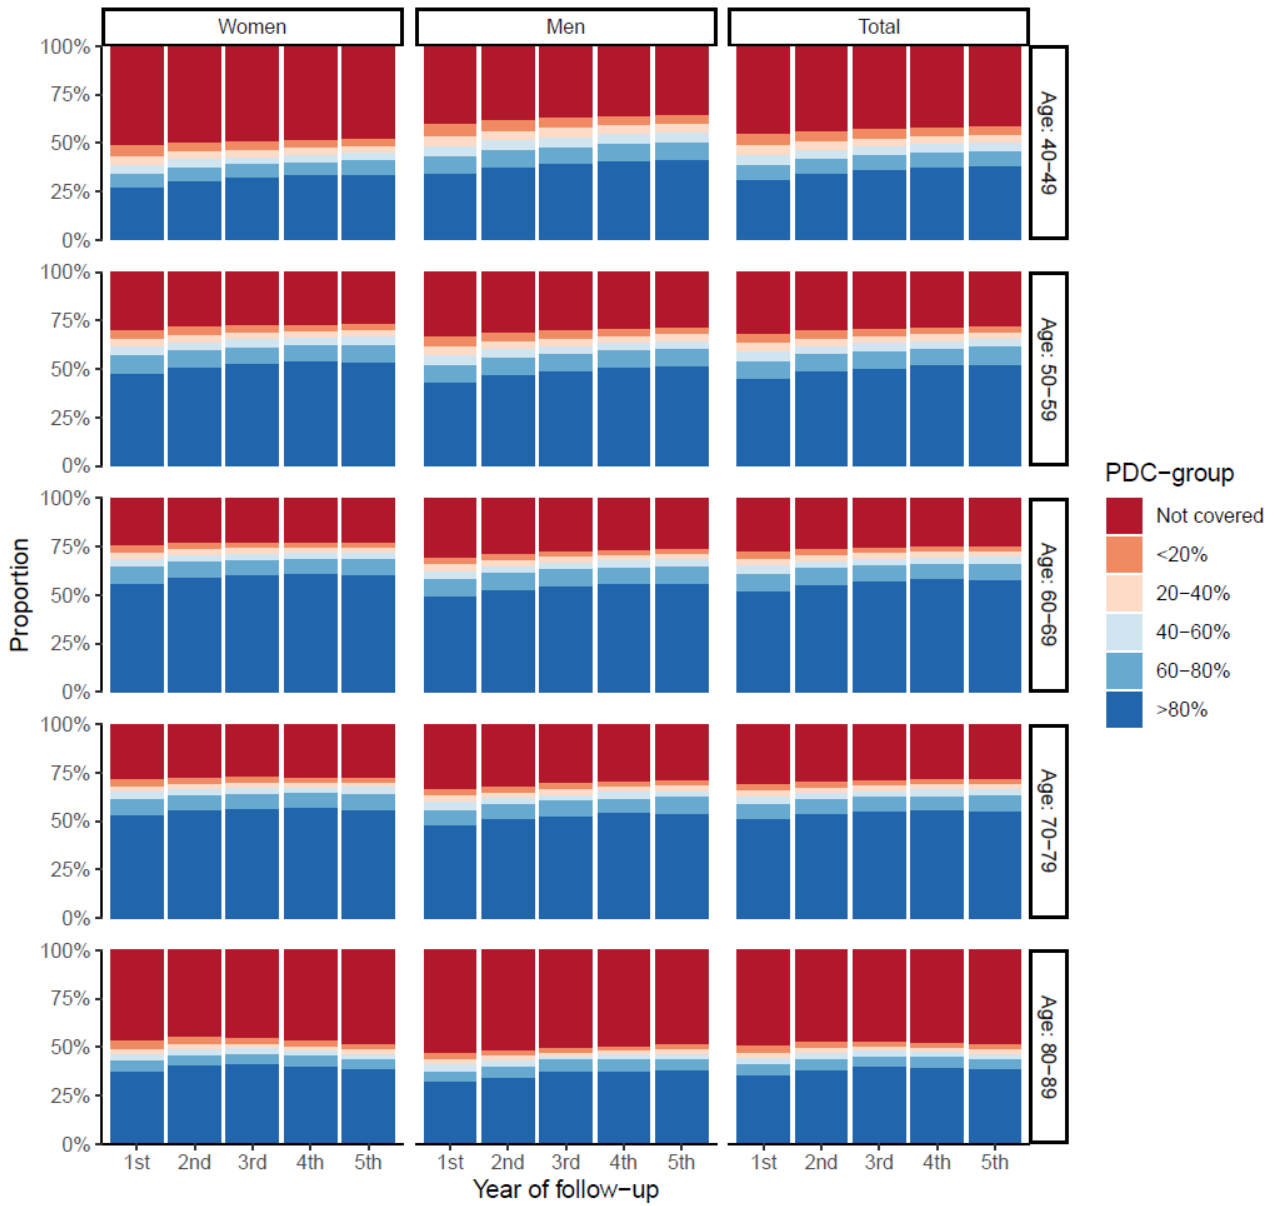

PDC = Proportion of days covered.

**Figure S9. Adjusted Hazard ratios of myocardial infarction, ischemic stroke or all-cause death according to coverage (red) and proportion of days covered (blue) of statins in the main analysis and the nested case-control population.**

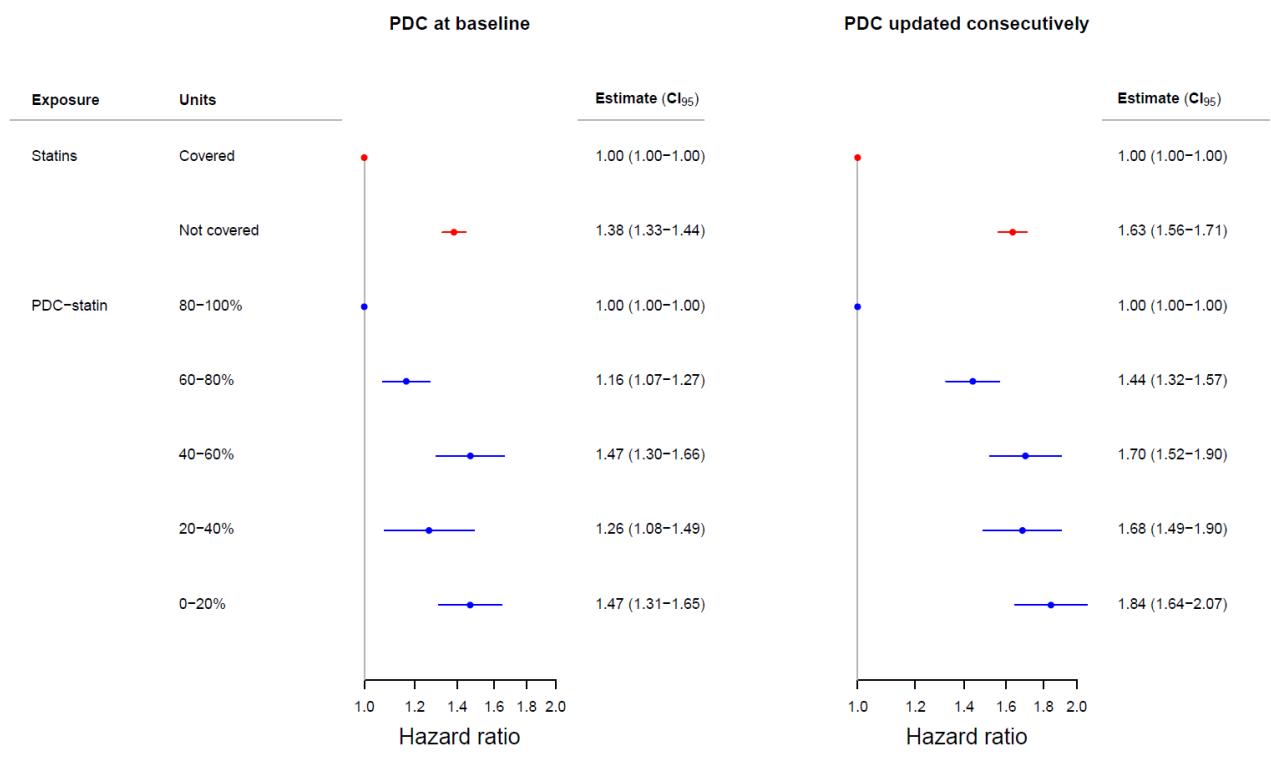

PDC = proportion of days covered.
